# Supplementary material
Source: PubMed Central journal article supplement (PMC7437403)
Supplement: NIHMS1618587-supplement-s_table_1.pdf [file NIHMS1618587-supplement-s_table_1.pdf]

|    | cBio Portal Patient ID | Diagnosis                                      | Tumor Type         | Fusion Partner | Breakpoint | NTRK gene | Breakpoint | Detected by IMPACT | Detected by Archer | IHC Results (1 = Positive; 0 = Negative) | membrane† | perinuclear‡ | nuclear‡ |
|----|------------------------|------------------------------------------------|--------------------|----------------|------------|-----------|------------|--------------------|--------------------|------------------------------------------|-----------|--------------|----------|
| 1  | P-0022467              | Anaplastic Thyroid Cancer                      | Thyroid            | IRF2BP2        | Exon 1     | NTRK1     | Exon 10    | YES                | YES                | 0                                        | 0         | 0            | 0        |
| 2  | P-0027277              | Angiosarcoma                                   | Sarcoma            | PEAR1          | Exon 15    | NTRK1     | Exon 10    | YES                | YES                | N/A                                      |           |              |          |
| 3  | P-0023994              | Breast Invasive Carcinoma                      | Breast             | LMNA           | Exon 10    | NTRK1     | Exon 11    | YES                | YES                | 1                                        | 0         | 3            | 0        |
| 4  | P-0000104              | Breast Invasive Lobular Carcinoma              | Breast             | ZBTB7B         | Exon 4     | NTRK1     | Exon 12    | YES                | YES                | N/A                                      |           |              |          |
| 5  | P-0029892              | Cholangiocarcinoma                             | Cholangiocarcinoma | PLEKHA6        | Exon 14    | NTRK1     | Exon 10    | YES                | YES                | 1                                        | 3         | 0            | 0        |
| 6  | P-0003329              | Cholangiocarcinoma                             | Cholangiocarcinoma | LMNA           | Exon 2     | NTRK1     | Exon 12    | YES                | N/A                | 1                                        | 0         | 2            | 1        |
| 7  | P-0007739              | Colon Adenocarcinoma                           | Colorectal         | LMNA           | Exon 8     | NTRK1     | Exon 12    | YES                | N/A                | 1                                        | 0         | 3            | 0        |
| 8  | P-0014143              | Colon Adenocarcinoma                           | Colorectal         | TPM3           | Exon 10    | NTRK1     | Exon 9     | YES                | YES                | 1                                        | 3         | 0            | 0        |
| 9  | P-0010581              | Colon Adenocarcinoma                           | Colorectal         | LMNA           | Exon 3     | NTRK1     | Exon 11    | YES                | N/A                | 1                                        | 0         | 0            | 0        |
| 10 | P-0013121              | Colon Adenocarcinoma                           | Colorectal         | LMNA           | Exon 12    | NTRK1     | Exon 12    | YES                | YES                | 1                                        | 0         | 3            | 0        |
| 11 | P-0012465              | Colon Adenocarcinoma                           | Colorectal         | TPM3           | Exon 8     | NTRK1     | Exon 10    | N/A                | YES                | 1                                        | 2         | 0            | 0        |
| 12 | P-0016347              | Cutaneous Melanoma                             | Melanoma           | TRIM63         | Exon 8     | NTRK1     | Exon 10    | YES                | YES                | 1                                        | 0         | 0            | 0        |
| 13 | P-0021467              | Glioblastoma                                   | Glioma             | TPM3           | Exon 9     | NTRK1     | Exon 10    | YES                | YES                | N/A                                      |           |              |          |
| 14 | P-0013559              | Glioblastoma                                   | Glioma             | AFAP1          | Exon 4     | NTRK1     | Exon 10    | YES                | YES                | 1                                        | 3         | 0            | 0        |
| 15 | P-0021262              | Lung Adenocarcinoma                            | Lung               | F11            | Exon 4     | NTRK1     | Exon 10    | YES                | YES                | 1                                        | 0         | 0            | 0        |
| 16 | P-0007050              | Lung Adenocarcinoma                            | Lung               | TPM3           | Exon 8     | NTRK1     | Exon 12    | YES                | YES                | 1                                        | 2         | 0            | 0        |
| 17 | P-0010628              | Lung Adenocarcinoma                            | Lung               | IRF2BP2        | Exon 1     | NTRK1     | Exon 10    | YES                | YES                | 1                                        | 0         | 0            | 0        |
| 18 | P-0018082              | Lung Adenocarcinoma                            | Lung               | TFG            | Exon 5     | NTRK1     | Exon 9     | YES                | N/A                | N/A                                      |           |              |          |
| 19 | P-0031754              | Lung Adenocarcinoma                            | Lung               | EPS15          | Exon 21    | NTRK1     | Exon 10    | NO†                | YES                | 1                                        | 2         | 0            | 0        |
| 20 | P-0037901              | Lung Adenocarcinoma                            | Lung               | EPS15          | Exon 21    | NTRK1     | Exon 10    | YES                | YES                | 1                                        | 2         | 0            | 0        |
| 21 | P-0029496              | Medullary Carcinoma of the Colon               | Colorectal         | TPM3           | Exon 8     | NTRK1     | Exon 10    | N/A                | YES                | 1                                        | 0         | 0            | 0        |
| 22 | P-0026354              | Melanoma                                       | Melanoma           | ARHGGEF11      | Exon 40    | NTRK1     | Exon 12    | YES                | YES                | 1                                        | 2         | 0            | 0        |
| 23 | P-0003705              | Mucinous Adenocarcinoma of the Appendix        | Appendiceal        | LMNA           | Exon 4     | NTRK1     | Exon 12    | YES                | YES                | 1                                        | 0         | 0            | 0        |
| 24 | P-0014859              | Pancreatic Adenocarcinoma                      | Pancreatic         | CTRC           | Exon1      | NTRK1     | Exon 8     | YES                | YES                | N/A                                      |           |              |          |
| 25 | P-0026375              | Papillary Thyroid Cancer                       | Thyroid            | TPM3           | Exon 8     | NTRK1     | Exon 10    | YES                | YES                | 1                                        | 0         | 0            | 0        |
| 26 | P-0024549              | Papillary Thyroid Cancer                       | Thyroid            | TPR            | Exon 21    | NTRK1     | Exon 10    | YES                | YES                | 1                                        | 0         | 0            | 0        |
| 27 | P-0029326              | Papillary Thyroid Cancer                       | Thyroid            | DIAPH1         | Exon 26    | NTRK1     | Exon 10    | YES                | YES                | N/A                                      |           |              |          |
| 28 | P-0027278              | Primary Neuroepithelial Tumor                  | Glioma             | KIF21B         | Exon 14    | NTRK1     | Exon 10    | YES                | YES                | N/A                                      |           |              |          |
| 29 | P-0010086              | S-100 positive malignant spindle cell neoplasm | Sarcoma            | LMNA           | Exon2      | NTRK1     | Exon 11    | YES                | YES                | 1                                        | 1         | 2            | 0        |
| 30 | P-0013321              | Lipofibromatosis-like neural tumor             | Sarcoma            | TPM3           | Exon 7     | NTRK1     | Exon 10    | N/A                | YES                | 1                                        | 0         | 0            | 0        |
| 31 | P-0025815              | Lipofibromatosis-like neural tumor             | Sarcoma            | TPM3           | Exon 8     | NTRK1     | Exon 10    | YES                | YES                | 1                                        | 0         | 0            | 0        |
| 32 | P-0021170              | High grade spindle cell sarcoma                | Sarcoma            | TPM3           | Exon 8     | NTRK1     | Exon 12    | YES                | YES                | 1                                        | 0         | 0            | 0        |
| 33 | P-0023987              | Uterine high grade pleomorphic sarcoma         | Sarcoma            | TPR            | Exon 22    | NTRK1     | Exon 10    | YES                | YES                | N/A                                      |           |              |          |
| 34 | P-0022925              | Low grade sarcoma                              | Sarcoma            | LMNA           | Exon 4     | NTRK1     | Exon 10    | YES                | N/A                | 1                                        | 0         | 0            | 0        |
| 35 | P-0026177              | Malignant spindle cell sarcoma                 | Sarcoma            | LMNA           | Exon 2     | NTRK1     | Exon 11    | N/A                | YES                | N/A                                      |           |              |          |
| 36 | P-0019359              | Uterine Sarcoma                                | Sarcoma            | LMNA           | Exon 11    | NTRK1     | Exon 12    | YES                | YES                | 1                                        | 0         | 0            | 3        |
| 37 | P-0019247              | Anorectal Mucosal Melanoma                     | Melanoma           | TRAF2          | Exon 9     | NTRK2     | Exon 15    | NO**               | YES                | 1                                        | 2         | 0            | 0        |
| 38 | P-0008457              | Glioblastoma                                   | Glioma             | BCR            | Exon 1     | NTRK2     | Exon 17    | NO                 | YES                | 1                                        | 3         | 0            | 0        |
| 39 | P-0039068              | Glioblastoma Multiforme                        | Glioma             | KANK1          | Exon 11    | NTRK2     | Exon 14    | NO                 | YES                | 1                                        | 0         | 0            | 0        |
| 40 | P-0032222              | Low grade neuroepithelial neoplasm             | Glioma             | QKI            | Exon 6     | NTRK2     | Exon 15    | N/A                | YES                | 1                                        | 0         | 0            | 1        |
| 41 | P-0021124              | Lung Adenocarcinoma                            | Lung               | STRN           | Exon 3     | NTRK2     | Exon 16    | NO                 | YES                | 1                                        | 0         | 0            | 0        |
| 42 | P-0013196              | Breast Invasive Carcinoma, Secretory           | Breast             | ETV6           | Exon 6     | NTRK3     | Exon 14    | YES                | YES                | 1                                        | 0         | 0            | 3        |
| 43 | P-0033921              | Breast Invasive Carcinoma, Secretory           | Breast             | ETV6           | Exon 5     | NTRK3     | Exon 15    | YES                | YES                | 1                                        | 0         | 0            | 2        |
| 44 | P-0025507              | Breast Invasive Ductal Carcinoma               | Breast             | ETV6           | Exon 5     | NTRK3     | Exon 15    | YES                | YES                | 1                                        | 0         | 0            | 3        |
| 45 | P-0037044              | Breast Invasive Ductal Carcinoma               | Breast             | SNHG26         | Exon 3     | NTRK3     | Exon 16    | YES                | YES                | 0                                        | 0         | 0            | 0        |
| 46 | P-0002671              | Colon Adenocarcinoma                           | Colorectal         | ETV6           | Exon 6     | NTRK3     | Exon 15    | YES                | YES                | 0                                        | 0         | 0            | 0        |
| 47 | P-0017925              | Colon Adenocarcinoma                           | Colorectal         | EML4           | Exon 2     | NTRK3     | Exon 14    | NO                 | YES                | 1                                        | 0         | 0            | 0        |
| 48 | P-0038638              | Colon Adenocarcinoma                           | Colorectal         | EML4           | Exon 2     | NTRK3     | Exon 14    | NO                 | YES                | N/A                                      |           |              |          |
| 49 | P-0013664              | Infantile Fibrosarcoma                         | Sarcoma            | ETV6           | Exon 5     | NTRK3     | Exon 15    | YES                | YES                | 0                                        | 0         | 0            | 0        |
| 50 | P-0012463              | Glioblastoma                                   | Glioma             | EML4           | Exon 2     | NTRK3     | Exon 14    | NO**               | YES                | 1                                        | 0         | 0            | 0        |
| 51 | P-0027006              | Infantile Fibrosarcoma                         | Sarcoma            | ETV6           | Exon 5     | NTRK3     | Exon 15    | YES                | YES                | 1                                        | 0         | 0            | 3        |
| 52 | P-0003368              | Inflammatory Myofibroblastic Tumor             | IMT                | ETV6           | Exon 5     | NTRK3     | Exon 15    | N/A                | YES                | 1                                        | 0         | 0            | 1        |
| 53 | P-0008951              | Inflammatory Myofibroblastic Tumor             | IMT                | ETV6           | Exon 5     | NTRK3     | Exon 15    | N/A                | YES                | 1                                        | 0         | 0            | 2        |
| 54 | P-0014872              | Inflammatory Myofibroblastic Tumor             | IMT                | ETV6           | Exon 5     | NTRK3     | Exon 15    | YES                | YES                | 1                                        | 0         | 0            | 0        |
| 55 | P-0003670              | Lung Adenocarcinoma                            | Lung               | SQSTM1         | Exon 5     | NTRK3     | Exon 14    | NO                 | YES                | 1                                        | 2         | 0            | 0        |
| 56 | P-0013859              | Lung Adenocarcinoma                            | Lung               | RBPMS          | Exon 5     | NTRK3     | Exon 14    | NO                 | YES                | 0                                        | 0         | 0            | 0        |
| 57 | P-0027671              | Spitzoid melanoma                              | Melanoma           | KANK1          | Exon 2     | NTRK3     | Exon 14    | N/A                | YES                | N/A                                      |           |              |          |
| 58 | P-0004737              | Pancreatic Adenocarcinoma                      | Pancreatic         | ETV6           | Exon 5     | NTRK3     | Exon 13    | YES                | N/A                | N/A                                      |           |              |          |
| 59 | P-0010264              | Pancreatic Adenocarcinoma                      | Pancreatic         | ETV6           | Exon 5     | NTRK3     | Exon 13    | YES                | N/A                | N/A                                      |           |              |          |
| 60 | P-0023215              | Pancreatic Adenocarcinoma                      | Pancreatic         | ETV6           | Exon 5     | NTRK3     | Exon 15    | YES                | YES                | N/A                                      |           |              |          |
| 61 | P-0035552              | Pancreatic Adenocarcinoma                      | Pancreatic         | ETV6           | Exon 4     | NTRK3     | Exon 14    | YES                | YES                | N/A                                      |           |              |          |
| 62 | P-0035767              | Pancreatic Neuroendocrine Tumor                | Neuroendocrine     | ETV6           | Exon 5     | NTRK3     | Exon 15    | YES                | YES                | N/A                                      |           |              |          |
| 63 | P-0005935              | Papillary Thyroid Cancer                       | Thyroid            | ETV6           | Exon 5     | NTRK3     | Exon 14    | N/A                | YES                | 0                                        | 0         | 0            | 0        |
| 64 | P-0021795              | Papillary Thyroid Cancer                       | Thyroid            | RBPMS          | Exon 5     | NTRK3     | Exon 14    | NO                 | YES                | 1                                        | 0         | 0            | 2        |

|    |           |                                        |                |               |        |              |         |      |      |     |   |   |   |
|----|-----------|----------------------------------------|----------------|---------------|--------|--------------|---------|------|------|-----|---|---|---|
| 65 | P-0026390 | Papillary Thyroid Cancer               | Thyroid        | <i>ETV6</i>   | Exon 4 | <i>NTRK3</i> | Exon 14 | YES  | YES  | 1   | 0 | 0 | 0 |
| 66 | P-0026696 | Papillary Thyroid Cancer               | Thyroid        | <i>ETV6</i>   | Exon 4 | <i>NTRK3</i> | Exon 14 | YES  | YES  | N/A |   |   |   |
| 67 | P-0033493 | Papillary Thyroid Cancer               | Thyroid        | <i>SQSTM1</i> | Exon 4 | <i>NTRK3</i> | Exon 14 | NO   | YES  | 1   | 3 | 0 | 0 |
| 68 | P-0037610 | Papillary Thyroid Cancer               | Thyroid        | <i>ETV6</i>   | Exon 5 | <i>NTRK3</i> | Exon 14 | YES  | N/A  | 1   | 0 | 0 | 0 |
| 69 | P-0036992 | Papillary Thyroid Cancer               | Thyroid        | <i>ETV6</i>   | Exon 5 | <i>NTRK3</i> | Exon 14 | YES  | N/A  | 1   | 0 | 0 | 0 |
| 70 | P-0007911 | Poorly Differentiated Thyroid Cancer   | Thyroid        | <i>ETV6</i>   | Exon 5 | <i>NTRK3</i> | Exon 13 | YES  | N/A  | 1   | 0 | 0 | 0 |
| 71 | P-0026357 | Poorly Differentiated Thyroid Cancer   | Thyroid        | <i>EML4</i>   | Exon 2 | <i>NTRK3</i> | Exon 14 | NO   | YES  | 1   | 0 | 0 | 0 |
| 72 | P-0025987 | Primary Neuroepithelial Tumor          | Glioma         | <i>ETV6</i>   | Exon 5 | <i>NTRK3</i> | Exon 14 | YES  | YES  | 1   | 3 | 0 | 0 |
| 73 | P-0021974 | High grade carcinoma of salivary gland | Salivary Gland | <i>ETV6</i>   | Exon 6 | <i>NTRK3</i> | Exon 15 | YES  | N/A  | 1   | 0 | 0 | 1 |
| 74 | P-0026286 | Secretory Carcinoma of Salivary Gland  | Salivary Gland | <i>ETV6</i>   | Exon 5 | <i>NTRK3</i> | Exon 14 | YES  | YES  | N/A |   |   |   |
| 75 | P-0010562 | Salivary Duct Carcinoma                | Salivary Gland | <i>ETV6</i>   | Exon 6 | <i>NTRK3</i> | Exon 13 | YES  | N/A  | 1   | 0 | 0 | 1 |
| 76 | P-0007552 | Spindle cell sarcoma                   | Sarcoma        | <i>TPM4</i>   | Exon 6 | <i>NTRK3</i> | Exon 11 | NO   | YES  | 1   | 0 | 0 | 0 |
| 77 | P-0002978 | Secretory Carcinoma of Salivary Gland  | Salivary Gland | <i>ETV6</i>   | Exon 5 | <i>NTRK3</i> | Exon 15 | YES  | YES  | 1   | 0 | 0 | 2 |
| 78 | N/A       | Secretory Carcinoma of Salivary Gland  | Salivary Gland | <i>ETV6</i>   | Exon 5 | <i>NTRK3</i> | Exon 15 | N/A  | YES  | N/A |   |   |   |
| 79 | P-0007772 | Secretory Carcinoma of Salivary Gland  | Salivary Gland | <i>ETV6</i>   | Exon 5 | <i>NTRK3</i> | Exon 13 | YES  | N/A  | 0   | 0 | 0 | 0 |
| 80 | P-0023257 | Secretory Carcinoma of Salivary Gland  | Salivary Gland | <i>ETV6</i>   | Exon 4 | <i>NTRK3</i> | Exon 14 | YES  | YES  | N/A |   |   |   |
| 81 | P-0006480 | Secretory Carcinoma of Salivary Gland  | Salivary Gland | <i>ETV6</i>   | Exon 6 | <i>NTRK3</i> | Exon 14 | YES  | N/A  | N/A |   |   |   |
| 82 | N/A       | Secretory Carcinoma of Salivary Gland  | Salivary Gland | <i>ETV6</i>   | *      | <i>NTRK3</i> | *       | N/A* | N/A* | 1   | 0 | 0 | 0 |
| 83 | P-0010668 | Secretory Carcinoma of Salivary Gland  | Salivary Gland | <i>ETV6</i>   | Exon 5 | <i>NTRK3</i> | Exon 15 | YES  | YES  | 1   | 0 | 0 | 3 |
| 84 | P-0016507 | Secretory Carcinoma of Salivary Gland  | Salivary Gland | <i>ETV6</i>   | Exon 6 | <i>NTRK3</i> | Exon 15 | YES  | N/A  | 1   | 0 | 0 | 2 |
| 85 | P-0018060 | Secretory Carcinoma of Salivary Gland  | Salivary Gland | <i>ETV6</i>   | Exon 6 | <i>NTRK3</i> | Exon 15 | YES  | N/A  | 1   | 0 | 0 | 1 |
| 86 | P-0032148 | Secretory Carcinoma of Salivary Gland  | Salivary Gland | <i>ETV6</i>   | Exon 6 | <i>NTRK3</i> | Exon 15 | YES  | N/A  | 1   | 0 | 0 | 2 |
| 87 | P-0031128 | Uterine Sarcoma                        | Sarcoma        | <i>EEF1A1</i> | Exon 8 | <i>NTRK3</i> | Exon 14 | N/A  | YES  | 0   | 0 | 0 | 0 |

Notes

- \* Fluorescence in situ hybridization using an *ETV6* breakpoint probe was positive in 83.3% of cells, confirming the diagnosis of secretory carcinoma of salivary gland
- \*\* An intragenic gain of the kinase domain of *NTRK* was observed upon manual review of copy number alterations, raising suspicion of a fusion
- † The specimen had very low tumor content and no alterations were seen by IMPACT.
- ‡ All cases positive by IHC show cytoplasmic staining. If additional staining patterns are seen, they are designated here as 1 = weak; 2 = moderate; 3 = strong
