# Supplementary material
Source: PubMed Central journal article supplement (PMC7437403)
Supplement: NIHMS1618587-supplement-s_table_2.pdf [file NIHMS1618587-supplement-s_table_2.pdf]

|    | cBio Portal | Diagnosis                                                       | Tumor type       | IMPACT Results for <i>NTRK</i>     | Archer Results for Expressed <i>NTRK fusions</i> | IHC Results (1 = Positive; 0 = Negative) | membrane‡ | cytoplasm‡ |
|----|-------------|-----------------------------------------------------------------|------------------|------------------------------------|--------------------------------------------------|------------------------------------------|-----------|------------|
| 1  | P-0006172   | Lung Adenocarcinoma                                             | Lung             | Structural Variant: P2RY8/NTRK1    | Negative                                         | 0                                        | 0         | 0          |
| 2  | P-0015004   | Well-Differentiated Liposarcoma                                 | Sarcoma          | Structural Variant: NTRK1/RABGAP1L | Negative                                         | 0                                        | 0         | 0          |
| 3  | P-0018812   | Prostate Adenocarcinoma                                         | Other            | Structural Variant: SLC28A3/NTRK2  | Negative                                         | 0                                        | 0         | 0          |
| 4  | P-0022046   | High-Grade Serous Ovarian Cancer                                | Other            | Structural Variant: RRNAD1/NTRK1   | Negative                                         | 0                                        | 0         | 0          |
| 5  | P-0015196   | Malignant Breast Neoplasm, NOS                                  | Breast           | Structural Variant: NTRK3/ALLC     | Negative                                         | 0                                        | 0         | 0          |
| 6  | P-0018762   | Pancreatobiliary Ampullary Carcinoma                            | Other            | Structural Variant: MIR6130/NTRK2  | Negative                                         | 0                                        | 0         | 0          |
| 7  | P-0021882   | High-Grade Serous Ovarian Cancer                                | Other            | Structural Variant: NTRK1/NTRK1    | Negative                                         | 0                                        | 0         | 0          |
| 8  | P-0024875   | Dedifferentiated Liposarcoma                                    | Sarcoma          | Structural Variant: FAM19A2/NTRK1  | Negative                                         | 0                                        | 0         | 0          |
| 9  | P-0027982   | Mucinous Adenocarcinoma of Unknown Primary                      | Other            | Structural Variant: NTRK2/NTRK2    | Negative                                         | 0                                        | 0         | 0          |
| 10 | P-0029111   | Anaplastic Astrocytoma                                          | Glioma           | Structural Variant: NTRK3/MUT      | Negative                                         | 1                                        | 0         | 3          |
| 11 | P-0019236   | Oligodendroglioma                                               | Glioma           | Structural Variant: NTRK2/NTRK2    | Negative                                         | 1                                        | 2         | 3          |
| 12 | P-0030777   | Dedifferentiated Liposarcoma                                    | Sarcoma          | Structural Variant: NTRK2/COLSA1   | Negative                                         | 0                                        | 0         | 0          |
| 13 | P-0029963   | Gastrointestinal Stromal Tumor                                  | Sarcoma          | Structural Variant: GABRB3/NTRK3   | Negative                                         | 1                                        | 2         | 2          |
| 14 | P-0031431   | Pancreatic Adenocarcinoma                                       | Pancreas         | Structural Variant: NTRK2/NTRK2    | Negative                                         | 0                                        | 0         | 0          |
| 15 | P-0025031   | Esophageal Adenocarcinoma                                       | Other            | Structural Variant: C10RF43/NTRK1  | Negative                                         | 0                                        | 0         | 0          |
| 16 | P-0038349   | Prostate Adenocarcinoma                                         | Other            | Structural Variant: VPS39/NTRK3    | Negative                                         | 0                                        | 0         | 0          |
| 17 | P-0002578   | Neuroblastoma                                                   | Small Round Blue | NTRK1 amplified                    | Negative                                         | 1                                        | 0         | 1          |
| 18 | P-0007059   | Uterine Perivascular Epithelioid Cell Tumor                     | Other            | NTRK1 amplified                    | Negative                                         | 0                                        | 0         | 0          |
| 19 | P-0015013   | Undifferentiated Uterine Sarcoma                                | Sarcoma          | NTRK1 amplified                    | Negative                                         | 0                                        | 0         | 0          |
| 20 | P-0016811   | Breast Invasive Ductal Carcinoma                                | Breast           | NTRK1 amplified                    | Negative                                         | 0                                        | 0         | 0          |
| 21 | P-0018484   | Uterine Endometrioid Carcinoma                                  | Other            | NTRK1 amplified                    | Negative                                         | 0                                        | 0         | 0          |
| 22 | P-0022346   | Papillary Thyroid Cancer                                        | Thyroid          | NTRK1 amplified                    | Negative                                         | 0                                        | 0         | 0          |
| 23 | P-0023539   | Embryonal Rhabdomyosarcoma                                      | Small Round Blue | NTRK1 amplified                    | Negative                                         | 0                                        | 0         | 0          |
| 24 | P-0024450   | Breast Invasive Ductal Carcinoma                                | Breast           | NTRK1 amplified                    | Negative                                         | 0                                        | 0         | 0          |
| 25 | P-0027024   | Breast Invasive Ductal Carcinoma                                | Breast           | NTRK1 amplified                    | Negative                                         | 0                                        | 0         | 0          |
| 26 | P-0027653   | Pancreatic Adenocarcinoma                                       | Pancreas         | NTRK1 amplified                    | Negative                                         | 0                                        | 0         | 0          |
| 27 | P-0028508   | High grade carcinoma with neuroendocrine features               | Neuroendocrine   | NTRK1 amplified                    | Negative                                         | 0                                        | 0         | 0          |
| 28 | P-0020880   | Undifferentiated Pleomorphic Sarcoma                            | Sarcoma          | NTRK3 amplified                    | Negative                                         | 1                                        | 0         | 2          |
| 29 | P-0029752   | Appendiceal adenocarcinoma with signet ring cell features       | Appendix         | NTRK3 amplified                    | Negative                                         | 0                                        | 0         | 0          |
| 30 | P-0012718   | Poorly Differentiated Thyroid Cancer                            | Thyroid          | Negative                           | Negative                                         | 0                                        | 0         | 0          |
| 31 | P-0015604   | Poorly Differentiated Thyroid Cancer                            | Thyroid          | Negative                           | Negative                                         | 0                                        | 0         | 0          |
| 32 | P-0015541   | Pancreatic Adenocarcinoma                                       | Pancreas         | Negative                           | Negative                                         | 0                                        | 0         | 0          |
| 33 | P-0015775   | Colon Adenocarcinoma                                            | Colorectal       | Negative                           | Negative                                         | 0                                        | 0         | 0          |
| 34 | P-0021041   | Undifferentiated Pleomorphic Sarcoma                            | Sarcoma          | Negative                           | Negative                                         | 0                                        | 0         | 0          |
| 35 | P-0021420   | Glioblastoma Multiforme                                         | Glioma           | Negative                           | Negative                                         | 0                                        | 0         | 0          |
| 36 | P-0022772   | Undifferentiated malignant epithelioid and round cell sarcoma   | Sarcoma          | N/A                                | Negative                                         | 0                                        | 0         | 0          |
| 37 | P-0023936   | Malignant Peripheral Nerve Sheath Tumor                         | Sarcoma          | Negative                           | Negative                                         | 0                                        | 0         | 0          |
| 38 | P-0024301   | Cutaneous Melanoma                                              | Melanoma         | Negative                           | Negative                                         | 0                                        | 0         | 0          |
| 39 | P-0017831   | Colon Adenocarcinoma                                            | Colorectal       | Negative                           | Negative                                         | 0                                        | 0         | 0          |
| 40 | P-0017894   | Colon Adenocarcinoma                                            | Colorectal       | Negative                           | Negative                                         | 0                                        | 0         | 0          |
| 41 | P-0018306   | Colon Adenocarcinoma                                            | Colorectal       | Negative                           | Negative                                         | 0                                        | 0         | 0          |
| 42 | P-0018753   | Colon Adenocarcinoma                                            | Colorectal       | Negative                           | Negative                                         | 0                                        | 0         | 0          |
| 43 | P-0029624   | Lung Adenocarcinoma                                             | Lung             | Negative                           | Negative                                         | 0                                        | 0         | 0          |
| 44 | P-0029687   | Lung Adenocarcinoma                                             | Lung             | Negative                           | Negative                                         | 0                                        | 0         | 0          |
| 45 | P-0029283   | Anaplastic Thyroid Cancer                                       | Thyroid          | Negative                           | Negative                                         | 0                                        | 0         | 0          |
| 46 | P-0030527   | Colon Adenocarcinoma                                            | Colorectal       | Negative                           | Negative                                         | 0                                        | 0         | 0          |
| 47 | P-0030861   | Polymorphous adenocarcinoma                                     | Salivary         | N/A                                | Negative                                         | 0                                        | 0         | 0          |
| 48 | P-0030683   | Papillary Thyroid Cancer                                        | Thyroid          | Negative                           | Negative                                         | 0                                        | 0         | 0          |
| 49 | P-0031356   | Breast Invasive Lobular Carcinoma                               | Breast           | Negative                           | Negative                                         | 0                                        | 0         | 0          |
| 50 | P-0032962   | Combined adenocarcinoma and high grade neuroendocrine carcinoma | Neuroendocrine   | Negative                           | Negative                                         | 1                                        | 0         | 1          |
| 51 | P-0019321   | Mixed acinar-neuroendocrine carcinoma                           | Neuroendocrine   | Negative                           | Negative                                         | 0                                        | 0         | 0          |
| 52 | P-0016343   | Poorly Differentiated Thyroid Cancer                            | Thyroid          | Negative                           | Negative                                         | 0                                        | 0         | 0          |
| 53 | P-0028276   | Biphasic salivary gland carcinoma                               | Salivary         | N/A                                | Negative                                         | 0                                        | 0         | 0          |
| 54 | P-0028284   | Salivary duct carcinoma                                         | Salivary         | N/A                                | Negative                                         | 0                                        | 0         | 0          |
| 55 | N/A         | Colon Adenocarcinoma                                            | Colorectal       | N/A                                | N/A                                              | 0                                        | 0         | 0          |
| 56 | N/A         | Colon Adenocarcinoma                                            | Colorectal       | N/A                                | N/A                                              | 0                                        | 0         | 0          |
| 57 | N/A         | Colon Adenocarcinoma                                            | Colorectal       | N/A                                | N/A                                              | 0                                        | 0         | 0          |
| 58 | N/A         | Colon Adenocarcinoma                                            | Colorectal       | N/A                                | N/A                                              | 0                                        | 0         | 0          |
| 59 | N/A         | Colon Adenocarcinoma                                            | Colorectal       | N/A                                | N/A                                              | 0                                        | 0         | 0          |
| 60 | N/A         | Colon Adenocarcinoma                                            | Colorectal       | N/A                                | N/A                                              | 0                                        | 0         | 0          |

|     |           |                                                                 |                    |          |          |   |   |   |
|-----|-----------|-----------------------------------------------------------------|--------------------|----------|----------|---|---|---|
| 61  | N/A       | Colon Adenocarcinoma                                            | Colorectal         | N/A      | N/A      | 0 | 0 | 0 |
| 62  | N/A       | Acinic Cell Carcinoma                                           | Salivary           | N/A      | N/A      | 0 | 0 | 0 |
| 63  | P-0036400 | High grade spindle cell sarcoma                                 | Sarcoma            | Negative | Negative | 0 | 0 | 0 |
| 64  | P-0035844 | Embryonal Rhabdomyosarcoma                                      | Small Round Blue   | Negative | Negative | 0 | 0 | 0 |
| 65  | P-0036577 | Adenoid Cystic Carcinoma                                        | Salivary           | Negative | Negative | 1 | 0 | 1 |
| 66  | P-0037407 | Undifferentiated round cell sarcoma with CIC gene rearrangement | Sarcoma            | Negative | Negative | 0 | 0 | 0 |
| 67  | P-0037894 | Uterine Pleomorphic Sarcoma                                     | Sarcoma            | Negative | Negative | 0 | 0 | 0 |
| 68  | P-0038137 | Non-Langerhans Cell Histiocytosis/Erdheim-Chester Disease       | Other              | Negative | Negative | 0 | 0 | 0 |
| 69  | P-0033079 | Breast Invasive Carcinoma                                       | Breast             | Negative | Negative | 0 | 0 | 0 |
| 70  | P-0034031 | Colorectal Adenocarcinoma                                       | Colorectal         | Negative | Negative | 0 | 0 | 0 |
| 71  | P-0034063 | Rectal Adenocarcinoma                                           | Colorectal         | Negative | Negative | 0 | 0 | 0 |
| 72  | P-0034197 | Uterine Leiomyosarcoma                                          | Sarcoma            | Negative | Negative | 0 | 0 | 0 |
| 73  | P-0034700 | Breast Invasive Ductal Carcinoma                                | Breast             | Negative | Negative | 0 | 0 | 0 |
| 74  | P-0035213 | Uterine Leiomyosarcoma                                          | Sarcoma            | Negative | Negative | 0 | 0 | 0 |
| 75  | P-0035181 | Lung Adenocarcinoma                                             | Lung               | Negative | Negative | 0 | 0 | 0 |
| 76  | P-0030153 | Leiomyosarcoma                                                  | Sarcoma            | Negative | Negative | 0 | 0 | 0 |
| 77  | P-0034321 | Endometrial Stromal Sarcoma                                     | Sarcoma            | Negative | Negative | 0 | 0 | 0 |
| 78  | P-0035972 | Adenoid Cystic Carcinoma                                        | Salivary           | Negative | Negative | 0 | 0 | 0 |
| 79  | P-0035090 | Uterine Leiomyosarcoma                                          | Sarcoma            | Negative | Negative | 0 | 0 | 0 |
| 80  | P-0036575 | Synovial Sarcoma                                                | Sarcoma            | Negative | Negative | 1 | 0 | 2 |
| 81  | P-0037134 | Poorly Differentiated Thyroid Cancer                            | Thyroid            | Negative | Negative | 0 | 0 | 0 |
| 82  | P-0031997 | Undifferentiated Pleomorphic Sarcoma                            | Sarcoma            | Negative | Negative | 0 | 0 | 0 |
| 83  | P-0036962 | Uterine Myxoid Leiomyosarcoma                                   | Sarcoma            | Negative | Negative | 1 | 0 | 1 |
| 84  | P-0037181 | High grade sarcoma                                              | Sarcoma            | Negative | Negative | 0 | 0 | 0 |
| 85  | P-0031439 | Breast Invasive Carcinoma with spindle cell features            | Breast             | Negative | Negative | 0 | 0 | 0 |
| 86  | P-0037799 | Gallbladder Adenocarcinoma                                      | Cholangiocarcinoma | Negative | Negative | 0 | 0 | 0 |
| 87  | P-0037809 | Lung Adenocarcinoma                                             | Lung               | Negative | Negative | 0 | 0 | 0 |
| 88  | P-0037437 | High grade undifferentiated spindle cell sarcoma                | Sarcoma            | Negative | Negative | 0 | 0 | 0 |
| 89  | P-0038211 | NUT Midline Carcinoma of the Head and Neck                      | Small Round Blue   | Negative | Negative | 1 | 1 | 0 |
| 90  | P-0038389 | Glioblastoma Multiforme                                         | Glioma             | Negative | Negative | 1 | 0 | 2 |
| 91  | P-0038535 | Synovial Sarcoma                                                | Sarcoma            | Negative | Negative | 1 | 0 | 1 |
| 92  | P-0035603 | Soft Tissue Myoepithelial Carcinoma                             | Other              | Negative | Negative | 0 | 0 | 0 |
| 93  | P-0038569 | Spindle cell sarcoma                                            | Sarcoma            | N/A      | Negative | 0 | 0 | 0 |
| 94  | P-0034822 | Uterine Pleomorphic Sarcoma                                     | Sarcoma            | N/A      | Negative | 1 | 0 | 2 |
| 95  | P-0034527 | Sarcoma with BCOR fusion                                        | Sarcoma            | N/A      | Negative | 1 | 0 | 2 |
| 96  | P-0038006 | Low grade spindle cell sarcoma                                  | Sarcoma            | N/A      | Negative | 0 | 0 | 0 |
| 97  | P-0038134 | Leiomyosarcoma                                                  | Sarcoma            | N/A      | Negative | 0 | 0 | 0 |
| 98  | P-0038396 | Solitary Fibrous Tumor/Hemangiopericytoma                       | Sarcoma            | N/A      | Negative | 0 | 0 | 0 |
| 99  | P-0036153 | Undifferentiated round cell sarcoma                             | Sarcoma            | N/A      | Negative | 0 | 0 | 0 |
| 100 | P-0038397 | Cellular pleomorphic adenoma with atypical features             | Salivary           | N/A      | Negative | 1 | 2 | 0 |
| 101 | P-0036150 | Sarcoma with BCOR fusion                                        | Sarcoma            | N/A      | Negative | 1 | 0 | 2 |
| 102 | P-0034824 | Granular Cell Tumor                                             | Other              | N/A      | Negative | 0 | 0 | 0 |
| 103 | P-0035649 | Uterine Myxoid Leiomyosarcoma                                   | Sarcoma            | N/A      | Negative | 1 | 0 | 1 |
| 104 | P-0034570 | Uterine Myxoid Leiomyosarcoma                                   | Sarcoma            | N/A      | Negative | 0 | 0 | 0 |
| 105 | P-0037710 | Leiomyosarcoma                                                  | Sarcoma            | N/A      | Negative | 0 | 0 | 0 |
| 106 | P-0034437 | Uterine Myxoid Leiomyosarcoma                                   | Sarcoma            | N/A      | Negative | 0 | 0 | 0 |
| 107 | P-0034025 | Extrahepatic Cholangiocarcinoma                                 | Cholangiocarcinoma | Negative | N/A      | 0 | 0 | 0 |
| 108 | P-0034796 | Extrahepatic Cholangiocarcinoma                                 | Cholangiocarcinoma | Negative | N/A      | 0 | 0 | 0 |
| 109 | P-0035011 | Extrahepatic Cholangiocarcinoma                                 | Cholangiocarcinoma | Negative | N/A      | 0 | 0 | 0 |
| 110 | P-0035318 | Intrahepatic Cholangiocarcinoma                                 | Cholangiocarcinoma | Negative | N/A      | 0 | 0 | 0 |
| 111 | P-0035574 | Intrahepatic Cholangiocarcinoma                                 | Cholangiocarcinoma | Negative | N/A      | 0 | 0 | 0 |
| 112 | P-0036159 | Cutaneous Melanoma                                              | Melanoma           | Negative | N/A      | 0 | 0 | 0 |
| 113 | P-0036358 | Intrahepatic Cholangiocarcinoma                                 | Cholangiocarcinoma | Negative | N/A      | 0 | 0 | 0 |
| 114 | P-0019247 | Anorectal Mucosal Melanoma                                      | Melanoma           | Negative | N/A      | 0 | 0 | 0 |
| 115 | P-0036559 | Cholangiocarcinoma                                              | Cholangiocarcinoma | Negative | N/A      | 0 | 0 | 0 |
| 116 | P-0036674 | Intrahepatic Cholangiocarcinoma                                 | Cholangiocarcinoma | Negative | N/A      | 0 | 0 | 0 |
| 117 | P-0038153 | Intrahepatic Cholangiocarcinoma                                 | Cholangiocarcinoma | Negative | N/A      | 0 | 0 | 0 |
| 118 | P-0039370 | Intrahepatic Cholangiocarcinoma                                 | Cholangiocarcinoma | Negative | N/A      | 0 | 0 | 0 |
| 119 | P-0040028 | Intrahepatic Cholangiocarcinoma                                 | Cholangiocarcinoma | Negative | N/A      | 0 | 0 | 0 |
| 120 | P-0035442 | Pancreatic Adenocarcinoma                                       | Pancreas           | Negative | N/A      | 0 | 0 | 0 |
| 121 | P-0035524 | Pancreatic Adenocarcinoma                                       | Pancreas           | Negative | N/A      | 0 | 0 | 0 |
| 122 | P-0035785 | Pancreatic Adenocarcinoma                                       | Pancreas           | Negative | N/A      | 0 | 0 | 0 |

|     |           |                                                   |          |          |          |   |   |   |
|-----|-----------|---------------------------------------------------|----------|----------|----------|---|---|---|
| 123 | P-0035833 | Pancreatic Adenocarcinoma                         | Pancreas | Negative | N/A      | 0 | 0 | 0 |
| 124 | P-0036117 | Pancreatic Adenocarcinoma                         | Pancreas | Negative | N/A      | 0 | 0 | 0 |
| 125 | P-0036115 | Pancreatic Adenocarcinoma                         | Pancreas | Negative | N/A      | 0 | 0 | 0 |
| 126 | P-0036108 | Pancreatic Adenocarcinoma                         | Pancreas | Negative | N/A      | 0 | 0 | 0 |
| 127 | P-0036432 | Pancreatic Adenocarcinoma                         | Pancreas | Negative | N/A      | 0 | 0 | 0 |
| 128 | P-0036533 | Pancreatic Adenocarcinoma                         | Pancreas | Negative | N/A      | 0 | 0 | 0 |
| 129 | P-0036610 | Pancreatic Adenocarcinoma                         | Pancreas | Negative | N/A      | 0 | 0 | 0 |
| 130 | P-0036919 | Pancreatic Adenocarcinoma                         | Pancreas | Negative | N/A      | 0 | 0 | 0 |
| 131 | P-0040302 | Pancreatic Adenocarcinoma                         | Pancreas | Negative | N/A      | 0 | 0 | 0 |
| 132 | P-0039601 | Pancreatic Adenocarcinoma                         | Pancreas | Negative | N/A      | 0 | 0 | 0 |
| 133 | P-0040033 | Pancreatic Adenocarcinoma                         | Pancreas | Negative | N/A      | 0 | 0 | 0 |
| 134 | P-0010937 | Cutaneous Melanoma                                | Melanoma | Negative | N/A      | 0 | 0 | 0 |
| 135 | P-0023993 | Cutaneous Melanoma                                | Melanoma | Negative | N/A      | 0 | 0 | 0 |
| 136 | P-0025268 | Anorectal Mucosal Melanoma                        | Melanoma | Negative | Negative | 0 | 0 | 0 |
| 137 | P-0026067 | Cutaneous Melanoma                                | Melanoma | N/A      | Negative | 0 | 0 | 0 |
| 138 | P-0026804 | Cutaneous Melanoma                                | Melanoma | Negative | Negative | 0 | 0 | 0 |
| 139 | P-0030890 | Head and Neck Mucosal Melanoma                    | Melanoma | Negative | Negative | 0 | 0 | 0 |
| 140 | P-0032342 | Head and Neck Mucosal Melanoma                    | Melanoma | Negative | Negative | 0 | 0 | 0 |
| 141 | P-0032810 | Mucosal Melanoma of the Vulva/Vagina              | Melanoma | Negative | Negative | 0 | 0 | 0 |
| 142 | P-0032710 | Anorectal Mucosal Melanoma                        | Melanoma | Negative | Negative | 0 | 0 | 0 |
| 143 | P-0034474 | Head and Neck Mucosal Melanoma                    | Melanoma | Negative | Negative | 0 | 0 | 0 |
| 144 | P-0033779 | Cutaneous Melanoma                                | Melanoma | Negative | N/A      | 0 | 0 | 0 |
| 145 | P-0027111 | Cutaneous Melanoma                                | Melanoma | Negative | Negative | 0 | 0 | 0 |
| 146 | P-0035430 | Cutaneous Melanoma                                | Melanoma | Negative | Negative | 0 | 0 | 0 |
| 147 | P-0027752 | Cutaneous Melanoma                                | Melanoma | Negative | Negative | 0 | 0 | 0 |
| 148 | P-0022273 | Glioneuronal neoplasm                             | Glioma   | N/A      | Negative | 1 | 0 | 1 |
| 149 | P-0023117 | Glioblastoma Multiforme                           | Glioma   | Negative | Negative | 1 | 0 | 2 |
| 150 | P-0022474 | Breast Invasive Ductal Carcinoma                  | Breast   | Negative | Negative | 0 | 0 | 0 |
| 151 | P-0024721 | Breast Invasive Ductal Carcinoma                  | Breast   | Negative | Negative | 0 | 0 | 0 |
| 152 | P-0025193 | Breast Invasive Ductal Carcinoma                  | Breast   | Negative | Negative | 1 | 0 | 1 |
| 153 | P-0025905 | Glioblastoma Multiforme                           | Glioma   | Negative | Negative | 1 | 0 | 1 |
| 154 | P-0017724 | Breast Invasive Ductal Carcinoma                  | Breast   | Negative | Negative | 0 | 0 | 0 |
| 155 | P-0019073 | Breast Invasive Ductal Carcinoma                  | Breast   | Negative | Negative | 1 | 0 | 1 |
| 156 | P-0028881 | Glioblastoma Multiforme                           | Glioma   | Negative | Negative | 1 | 0 | 1 |
| 157 | P-0029891 | Glioblastoma Multiforme                           | Glioma   | N/A      | Negative | 1 | 0 | 1 |
| 158 | P-0029776 | Glioblastoma Multiforme                           | Glioma   | Negative | Negative | 1 | 0 | 2 |
| 159 | P-0031106 | Gliosarcoma                                       | Glioma   | Negative | Negative | 1 | 0 | 1 |
| 160 | P-0031289 | Glioblastoma Multiforme                           | Glioma   | Negative | Negative | 0 | 0 | 0 |
| 161 | P-0031529 | Breast Invasive Ductal Carcinoma                  | Breast   | Negative | Negative | 0 | 0 | 0 |
| 162 | P-0018544 | Glioblastoma Multiforme                           | Glioma   | Negative | Negative | 0 | 0 | 0 |
| 163 | P-0031689 | Breast Invasive Ductal Carcinoma                  | Breast   | Negative | Negative | 1 | 0 | 1 |
| 164 | P-0032436 | Breast Invasive Ductal Carcinoma                  | Breast   | Negative | Negative | 0 | 0 | 0 |
| 165 | P-0026629 | Breast Invasive Ductal Carcinoma                  | Breast   | Negative | Negative | 0 | 0 | 0 |
| 166 | P-0032544 | Invasive Breast Carcinoma                         | Breast   | Negative | Negative | 0 | 0 | 0 |
| 167 | P-0032572 | Invasive Breast Carcinoma                         | Breast   | Negative | Negative | 0 | 0 | 0 |
| 168 | P-0033207 | Breast Invasive Ductal Carcinoma                  | Breast   | Negative | Negative | 0 | 0 | 0 |
| 169 | P-0033517 | Glioblastoma Multiforme                           | Glioma   | Negative | Negative | 1 | 0 | 1 |
| 170 | P-0033466 | Breast Invasive Ductal Carcinoma                  | Breast   | Negative | Negative | 0 | 0 | 0 |
| 171 | P-0034294 | Glioblastoma Multiforme                           | Glioma   | Negative | Negative | 0 | 0 | 0 |
| 172 | P-0034558 | Glioblastoma Multiforme                           | Glioma   | Negative | Negative | 1 | 0 | 1 |
| 173 | P-0026176 | Glioblastoma Multiforme                           | Glioma   | N/A      | Negative | 1 | 0 | 1 |
| 174 | P-0023737 | Breast Invasive Ductal Carcinoma                  | Breast   | Negative | Negative | 0 | 0 | 0 |
| 175 | P-0035490 | Breast Invasive Ductal Carcinoma                  | Breast   | Negative | Negative | 1 | 0 | 1 |
| 176 | P-0036004 | Breast Invasive Ductal Carcinoma                  | Breast   | Negative | Negative | 0 | 0 | 0 |
| 177 | P-0036126 | Breast Invasive Ductal Carcinoma                  | Breast   | Negative | Negative | 0 | 0 | 0 |
| 178 | P-0010302 | Glioblastoma Multiforme                           | Glioma   | Negative | N/A      | 1 | 0 | 1 |
| 179 | P-0037053 | Low grade pediatric glioma of MYB-rearranged type | Glioma   | N/A      | Negative | 1 | 0 | 1 |
| 180 | P-0028018 | Glioblastoma Multiforme                           | Glioma   | Negative | Negative | 1 | 0 | 3 |
| 181 | P-0028693 | Breast Invasive Cancer                            | Breast   | N/A      | Negative | 1 | 0 | 1 |
| 182 | P-0028599 | Breast Invasive Ductal Carcinoma                  | Breast   | Negative | Negative | 0 | 0 | 0 |
| 183 | P-0028524 | Glioblastoma Multiforme                           | Glioma   | Negative | Negative | 0 | 0 | 0 |
| 184 | P-0038884 | Glioblastoma Multiforme                           | Glioma   | Negative | Negative | 1 | 1 | 1 |

|     |           |                                                                       |                    |          |          |   |   |   |
|-----|-----------|-----------------------------------------------------------------------|--------------------|----------|----------|---|---|---|
| 185 | P-0038820 | Glioblastoma Multiforme                                               | Glioma             | Negative | Negative | 1 | 0 | 1 |
| 186 | P-0039917 | Pilocytic astrocytoma                                                 | Glioma             | N/A      | Negative | 1 | 0 | 3 |
| 187 | P-0013917 | Mammary carcinoid tumor                                               | Neuroendocrine     | Negative | Negative | 0 | 0 | 0 |
| 188 | P-0016171 | Polymorphous adenocarcinoma                                           | Salivary           | Negative | Negative | 0 | 0 | 0 |
| 189 | P-0001377 | Low grade myxoid spindle cell sarcoma                                 | Sarcoma            | Negative | Negative | 0 | 0 | 0 |
| 190 | P-0022258 | Pleomorphic adenoma                                                   | Salivary           | N/A      | Negative | 1 | 0 | 1 |
| 191 | P-0017162 | Embryonal Rhabdomyosarcoma                                            | Small Round Blue   | Negative | Negative | 0 | 0 | 0 |
| 192 | P-0019979 | Large Cell Neuroendocrine Carcinoma                                   | Neuroendocrine     | Negative | Negative | 0 | 0 | 0 |
| 193 | P-0021234 | Adenoid Cystic Carcinoma                                              | Salivary           | Negative | Negative | 0 | 0 | 0 |
| 194 | P-0023492 | Adenoid Cystic Carcinoma                                              | Salivary           | Negative | Negative | 0 | 0 | 0 |
| 195 | P-0024846 | Ewing Sarcoma                                                         | Small Round Blue   | Negative | Negative | 0 | 0 | 0 |
| 196 | P-0025278 | Small Cell Carcinoma of the Ovary                                     | Neuroendocrine     | Negative | Negative | 0 | 0 | 0 |
| 197 | P-0025944 | Adenoid Cystic Carcinoma                                              | Salivary           | Negative | Negative | 1 | 0 | 2 |
| 198 | P-0018272 | High-Grade Neuroendocrine Carcinoma of the Colon and Rectum           | Neuroendocrine     | Negative | Negative | 0 | 0 | 0 |
| 199 | P-0032264 | Neuroendocrine Carcinoma of Esophagus                                 | Neuroendocrine     | Negative | Negative | 0 | 0 | 0 |
| 200 | P-0032615 | Pancreatic Adenocarcinoma                                             | Pancreas           | Negative | Negative | 0 | 0 | 0 |
| 201 | P-0034082 | Pancreatic Adenocarcinoma                                             | Pancreas           | Negative | Negative | 0 | 0 | 0 |
| 202 | P-0035304 | Hyalinizing clear cell carcinoma of salivary gland                    | Salivary           | N/A      | Negative | 1 | 1 | 0 |
| 203 | P-0035510 | Lung Neuroendocrine Tumor                                             | Neuroendocrine     | Negative | N/A      | 0 | 0 | 0 |
| 204 | P-0036151 | Basal cell adenoma                                                    | Salivary           | N/A      | Negative | 0 | 0 | 0 |
| 205 | P-0036670 | Adenoid Cystic Carcinoma                                              | Salivary           | Negative | Negative | 1 | 0 | 1 |
| 206 | P-0036669 | Adenoid Cystic Carcinoma                                              | Salivary           | Negative | Negative | 0 | 0 | 0 |
| 207 | P-0030366 | Adenoid Cystic Carcinoma                                              | Salivary           | Negative | Negative | 1 | 0 | 2 |
| 208 | P-0039185 | Pancreatic Adenocarcinoma                                             | Pancreas           | Negative | Negative | 0 | 0 | 0 |
| 209 | P-0040114 | Poorly Differentiated Malignant Epithelioid Neoplasm of Parotid Gland | Salivary           | Negative | Negative | 0 | 0 | 0 |
| 210 | P-0037182 | Desmoplastic Small-Round-Cell Tumor                                   | Small Round Blue   | Negative | Negative | 1 | 2 | 0 |
| 211 | P-0037993 | High grade salivary gland carcinoma with BRD4-NUTM1 fusion            | Salivary           | N/A      | Negative | 1 | 0 | 1 |
| 212 | P-0037454 | Anaplastic Thyroid Cancer                                             | Thyroid            | Negative | Negative | 0 | 0 | 0 |
| 213 | P-0017293 | Cholangiocarcinoma                                                    | Cholangiocarcinoma | Negative | Negative | 0 | 0 | 0 |
| 214 | P-0024469 | Cholangiocarcinoma                                                    | Cholangiocarcinoma | Negative | Negative | 0 | 0 | 0 |
| 215 | P-0013120 | Embryonal Rhabdomyosarcoma                                            | Small Round Blue   | Negative | Negative | 0 | 0 | 0 |
| 216 | P-0026074 | Acinic Cell Carcinoma                                                 | Salivary           | Negative | Negative | 0 | 0 | 0 |
| 217 | P-0030044 | Ewing Sarcoma                                                         | Small Round Blue   | Negative | Negative | 0 | 0 | 0 |
| 218 | P-0030397 | Desmoplastic Small-Round-Cell Tumor                                   | Small Round Blue   | Negative | Negative | 1 | 2 | 0 |
| 219 | P-0030530 | Basal cell adenocarcinoma of submandibular gland                      | Salivary           | N/A      | Negative | 0 | 0 | 0 |
| 220 | P-0030650 | Desmoplastic Small-Round-Cell Tumor                                   | Small Round Blue   | Negative | Negative | 1 | 0 | 1 |
| 221 | P-0030713 | Embryonal Rhabdomyosarcoma                                            | Small Round Blue   | Negative | Negative | 0 | 0 | 0 |
| 222 | P-0030585 | Cholangiocarcinoma                                                    | Cholangiocarcinoma | Negative | Negative | 0 | 0 | 0 |
| 223 | P-0030917 | Desmoplastic Small-Round-Cell Tumor                                   | Small Round Blue   | Negative | Negative | 1 | 0 | 2 |
| 224 | P-0030858 | Embryonal Rhabdomyosarcoma                                            | Small Round Blue   | Negative | Negative | 0 | 0 | 0 |
| 225 | P-0031107 | Ewing Sarcoma                                                         | Small Round Blue   | N/A      | Negative | 0 | 0 | 0 |
| 226 | P-0031544 | Ewing Sarcoma                                                         | Small Round Blue   | N/A      | Negative | 1 | 0 | 1 |
| 227 | P-0031835 | Cholangiocarcinoma                                                    | Cholangiocarcinoma | Negative | Negative | 0 | 0 | 0 |
| 228 | P-0031993 | Adenoid Cystic Carcinoma                                              | Salivary           | Negative | Negative | 1 | 0 | 1 |
| 229 | P-0031733 | Adenoid Cystic Carcinoma                                              | Salivary           | Negative | Negative | 1 | 0 | 1 |
| 230 | P-0018770 | Embryonal Rhabdomyosarcoma                                            | Small Round Blue   | Negative | Negative | 0 | 0 | 0 |
| 231 | P-0032563 | Cholangiocarcinoma                                                    | Cholangiocarcinoma | Negative | Negative | 0 | 0 | 0 |
| 232 | P-0033473 | Undifferentiated Round Cell Sarcoma with BCOR-CCNB3 fusion            | Sarcoma            | Negative | Negative | 0 | 0 | 0 |
| 233 | P-0033922 | Desmoplastic Small-Round-Cell Tumor                                   | Small Round Blue   | Negative | Negative | 1 | 0 | 3 |
| 234 | P-0034053 | Embryonal Rhabdomyosarcoma                                            | Small Round Blue   | Negative | Negative | 1 | 0 | 1 |
| 235 | P-0033326 | Gallbladder Adenocarcinoma                                            | Cholangiocarcinoma | Negative | N/A      | 0 | 0 | 0 |
| 236 | P-0033985 | Adenoid Cystic Carcinoma                                              | Salivary           | Negative | Negative | 1 | 0 | 1 |
| 237 | P-0034344 | Round Cell Sarcoma with BCOR fusion                                   | Sarcoma            | Negative | Negative | 1 | 0 | 3 |
| 238 | P-0034825 | Low grade chondrosarcoma with BCOR fusion                             | Sarcoma            | N/A      | Negative | 0 | 0 | 0 |
| 239 | P-0017971 | Cholangiocarcinoma                                                    | Cholangiocarcinoma | Negative | Negative | 0 | 0 | 0 |
| 240 | P-0028523 | Ampullary Carcinoma                                                   | Other              | Negative | Negative | 0 | 0 | 0 |
| 241 | P-0011485 | Poorly Differentiated Thyroid Cancer                                  | Thyroid            | Negative | Negative | 0 | 0 | 0 |
| 242 | P-0015310 | Papillary Thyroid Cancer                                              | Thyroid            | Negative | Negative | 0 | 0 | 0 |
| 243 | P-0022617 | Anaplastic Thyroid Cancer                                             | Thyroid            | Negative | Negative | 0 | 0 | 0 |
| 244 | P-0022553 | Anaplastic Thyroid Cancer                                             | Thyroid            | Negative | Negative | 0 | 0 | 0 |
| 245 | P-0023180 | Poorly Differentiated Thyroid Cancer                                  | Thyroid            | N/A      | Negative | 0 | 0 | 0 |
| 246 | P-0024988 | Poorly Differentiated Thyroid Cancer                                  | Thyroid            | Negative | Negative | 0 | 0 | 0 |

|     |           |                                            |                  |          |          |   |   |   |
|-----|-----------|--------------------------------------------|------------------|----------|----------|---|---|---|
| 247 | P-0010564 | Poorly Differentiated Thyroid Cancer       | Thyroid          | Negative | Negative | 0 | 0 | 0 |
| 248 | P-0011091 | Poorly Differentiated Thyroid Cancer       | Thyroid          | Negative | Negative | 0 | 0 | 0 |
| 249 | P-0030915 | Poorly Differentiated Thyroid Cancer       | Thyroid          | N/A      | N/A      | 0 | 0 | 0 |
| 250 | P-0030819 | Poorly Differentiated Thyroid Cancer       | Thyroid          | Negative | N/A      | 0 | 0 | 0 |
| 251 | P-0031442 | Lung Adenocarcinoma                        | Lung             | Negative | Negative | 0 | 0 | 0 |
| 252 | P-0031048 | Lung Adenocarcinoma                        | Lung             | Negative | Negative | 0 | 0 | 0 |
| 253 | P-0032292 | Lung Adenocarcinoma                        | Lung             | Negative | Negative | 0 | 0 | 0 |
| 254 | P-0032887 | Lung Adenocarcinoma                        | Lung             | N/A      | Negative | 0 | 0 | 0 |
| 255 | P-0002061 | Hurthle Cell Thyroid Cancer                | Thyroid          | Negative | Negative | 0 | 0 | 0 |
| 256 | P-0026528 | Anaplastic Thyroid Cancer                  | Thyroid          | Negative | Negative | 0 | 0 | 0 |
| 257 | P-0033178 | Lung Adenocarcinoma                        | Lung             | Negative | Negative | 0 | 0 | 0 |
| 258 | P-0033325 | Lung Adenocarcinoma                        | Lung             | Negative | Negative | 0 | 0 | 0 |
| 259 | P-0016092 | Poorly Differentiated Thyroid Cancer       | Thyroid          | Negative | Negative | 0 | 0 | 0 |
| 260 | P-0019856 | Lung Adenocarcinoma                        | Lung             | Negative | Negative | 0 | 0 | 0 |
| 261 | P-0021433 | Anaplastic Thyroid Cancer                  | Thyroid          | Negative | N/A      | 0 | 0 | 0 |
| 262 | P-0033998 | Lung Adenocarcinoma                        | Lung             | Negative | Negative | 0 | 0 | 0 |
| 263 | P-0033603 | Lung Adenocarcinoma                        | Lung             | Negative | Negative | 0 | 0 | 0 |
| 264 | P-0033884 | Lung Adenocarcinoma                        | Lung             | Negative | Negative | 0 | 0 | 0 |
| 265 | P-0034571 | Lung Adenocarcinoma                        | Lung             | Negative | Negative | 0 | 0 | 0 |
| 266 | P-0034948 | Lung Adenocarcinoma                        | Lung             | Negative | Negative | 0 | 0 | 0 |
| 267 | P-0034681 | Papillary Thyroid Cancer                   | Thyroid          | Negative | Negative | 0 | 0 | 0 |
| 268 | P-0035139 | Lung Adenocarcinoma                        | Lung             | Negative | Negative | 0 | 0 | 0 |
| 269 | P-0026137 | Hurthle Cell Thyroid Cancer                | Thyroid          | Negative | N/A      | 0 | 0 | 0 |
| 270 | P-0033629 | Hurthle Cell Thyroid Cancer                | Thyroid          | Negative | N/A      | 0 | 0 | 0 |
| 271 | P-0036201 | Lung Adenocarcinoma                        | Lung             | Negative | Negative | 0 | 0 | 0 |
| 272 | P-0002233 | Poorly Differentiated Thyroid Cancer       | Thyroid          | Negative | Negative | 0 | 0 | 0 |
| 273 | P-0027699 | Hurthle Cell Thyroid Cancer                | Thyroid          | Negative | N/A      | 0 | 0 | 0 |
| 274 | P-0010338 | Lung Adenocarcinoma                        | Lung             | Negative | Negative | 0 | 0 | 0 |
| 275 | P-0037149 | Lung Adenocarcinoma                        | Lung             | Negative | Negative | 0 | 0 | 0 |
| 276 | P-0037219 | Lung Adenocarcinoma                        | Lung             | Negative | Negative | 0 | 0 | 0 |
| 277 | P-0038133 | Lung Adenocarcinoma                        | Lung             | Negative | Negative | 0 | 0 | 0 |
| 278 | P-0037983 | Lung Adenocarcinoma                        | Lung             | Negative | Negative | 0 | 0 | 0 |
| 279 | P-0039051 | Rectal Adenocarcinoma                      | Colorectal       | Negative | Negative | 0 | 0 | 0 |
| 280 | P-0040421 | Ewing Sarcoma of Soft Tissue               | Small Round Blue | N/A      | Negative | 0 | 0 | 0 |
| 281 | P-0037030 | Colon Adenocarcinoma                       | Colorectal       | Negative | Negative | 0 | 0 | 0 |
| 282 | P-0037066 | Colon Adenocarcinoma                       | Colorectal       | Negative | Negative | 0 | 0 | 0 |
| 283 | P-0022691 | Colon Adenocarcinoma                       | Colorectal       | Negative | Negative | 0 | 0 | 0 |
| 284 | P-0037388 | Colorectal Adenocarcinoma                  | Colorectal       | Negative | Negative | 0 | 0 | 0 |
| 285 | P-0037744 | Colorectal Adenocarcinoma                  | Colorectal       | Negative | Negative | 0 | 0 | 0 |
| 286 | P-0038050 | Colon Adenocarcinoma                       | Colorectal       | Negative | Negative | 0 | 0 | 0 |
| 287 | P-0036633 | Colon Adenocarcinoma                       | Colorectal       | Negative | Negative | 0 | 0 | 0 |
| 288 | P-0038691 | Colorectal Adenocarcinoma                  | Colorectal       | Negative | Negative | 0 | 0 | 0 |
| 289 | P-0038616 | Colorectal Adenocarcinoma                  | Colorectal       | Negative | Negative | 0 | 0 | 0 |
| 290 | P-0039878 | Breast Invasive Ductal Carcinoma           | Breast           | N/A      | Negative | 0 | 0 | 0 |
| 291 | P-0040422 | Adenoid Cystic Carcinoma                   | Salivary         | Negative | Negative | 1 | 0 | 2 |
| 292 | P-0021274 | Prostate Adenocarcinoma                    | Other            | Negative | Negative | 0 | 0 | 0 |
| 293 | P-0020844 | Prostate Adenocarcinoma                    | Other            | Negative | Negative | 0 | 0 | 0 |
| 294 | P-0024220 | Prostate Adenocarcinoma                    | Other            | Negative | Negative | 0 | 0 | 0 |
| 295 | P-0017969 | Neuroblastoma                              | Small Round Blue | Negative | Negative | 1 | 0 | 1 |
| 296 | P-0029699 | Inflammatory Myofibroblastic Tumor         | IMT              | N/A      | Negative | 0 | 0 | 0 |
| 297 | P-0029354 | High-Grade Serous Ovarian Cancer           | Other            | Negative | Negative | 0 | 0 | 0 |
| 298 | P-0019682 | Neuroblastoma                              | Small Round Blue | Negative | Negative | 1 | 0 | 3 |
| 299 | P-0030399 | Inflammatory Myofibroblastic Tumor         | IMT              | N/A      | Negative | 0 | 0 | 0 |
| 300 | P-0029155 | Esophageal Squamous Cell Carcinoma         | Other            | Negative | Negative | 0 | 0 | 0 |
| 301 | P-0031129 | Esophagogastric Adenocarcinoma             | Other            | Negative | Negative | 0 | 0 | 0 |
| 302 | P-0031806 | Neuroblastoma                              | Small Round Blue | N/A      | Negative | 1 | 0 | 1 |
| 303 | P-0032339 | High-Grade Serous Ovarian Cancer           | Other            | Negative | Negative | 0 | 0 | 0 |
| 304 | P-0033281 | Inflammatory Myofibroblastic Bladder Tumor | IMT              | N/A      | Negative | 0 | 0 | 0 |
| 305 | P-0033176 | Endometrial Carcinoma                      | Other            | Negative | Negative | 0 | 0 | 0 |
| 306 | P-0034119 | Inflammatory Myofibroblastic Tumor         | IMT              | N/A      | Negative | 0 | 0 | 0 |
| 307 | P-0036229 | Neuroblastoma                              | Small Round Blue | Negative | Negative | 1 | 0 | 3 |
| 308 | P-0037022 | Prostate Adenocarcinoma                    | Other            | Negative | Negative | 0 | 0 | 0 |

|     |           |                                    |       |          |          |   |   |   |
|-----|-----------|------------------------------------|-------|----------|----------|---|---|---|
| 309 | P-0036736 | Inflammatory Myofibroblastic Tumor | IMT   | N/A      | Negative | 0 | 0 | 0 |
| 310 | P-0027075 | High-Grade Serous Ovarian Cancer   | Other | Negative | Negative | 0 | 0 | 0 |
| 311 | P-0028070 | Endometrial Carcinoma              | Other | Negative | Negative | 0 | 0 | 0 |
| 312 | P-0011475 | Prostate Adenocarcinoma            | Other | Negative | Negative | 0 | 0 | 0 |
| 313 | P-0038155 | High-Grade Serous Ovarian Cancer   | Other | Negative | Negative | 0 | 0 | 0 |
| 314 | P-0026935 | Uterine Endometrioid Carcinoma     | Other | Negative | Negative | 0 | 0 | 0 |
| 315 | P-0038969 | Prostate Adenocarcinoma            | Other | Negative | Negative | 0 | 0 | 0 |
| 316 | P-0039657 | Prostate Adenocarcinoma            | Other | Negative | Negative | 0 | 0 | 0 |
| 317 | P-0039993 | High-Grade Serous Ovarian Cancer   | Other | Negative | Negative | 0 | 0 | 0 |

‡ In these false positive cases, only cytoplasmic and membranous staining patterns are seen, and are designated as 1 = weak; 2 = moderate; 3 = strong
